# Supplementary material for: A novel DLX3–PKC integrated signaling network drives keratinocyte differentiation
Source: PubMed Central journal article supplement — Cell Death Differ. 2017 Feb 10;24(4):717–30. doi: 10.1038/cdd.2017.5 (PMC5384032; doi:10.1038/cdd.2017.5), 2017-02-10
Supplement: cdd20175x2.pdf [file cdd20175x2.pdf]

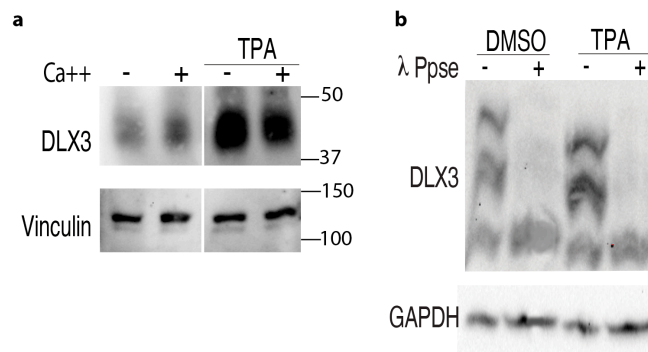

**Supplementary Figure S2.** PKC activation induces DLX3 expression and phosphorylation. (a) DLX3 expression by Western Blot in primary cultured keratinocytes at 6-hours post TPA in proliferative (0.05mM Ca<sup>++</sup>) or differentiating (0.12mM Ca<sup>++</sup>) conditions. (b) DLX3 phosphorylation detection by Phos-tag acrylamide (Wako Pure Chemical Industries, Ltd) on keratinocytes transduced with the Adeno-DLX3 expression vector and treated with TPA or DMSO (control) at 1-hour post treatment, in presence or absence of protein phosphatase inhibitor ( $\lambda$  Ppse). For both experiments GAPDH was used as loading control.

## Figure S2
