# Supplementary material for: A novel DLX3–PKC integrated signaling network drives keratinocyte differentiation
Source: PubMed Central journal article supplement — Cell Death Differ. 2017 Feb 10;24(4):717–30. doi: 10.1038/cdd.2017.5 (PMC5384032; doi:10.1038/cdd.2017.5), 2017-02-10
Supplement: cdd20175x3.pdf [file cdd20175x3.pdf]

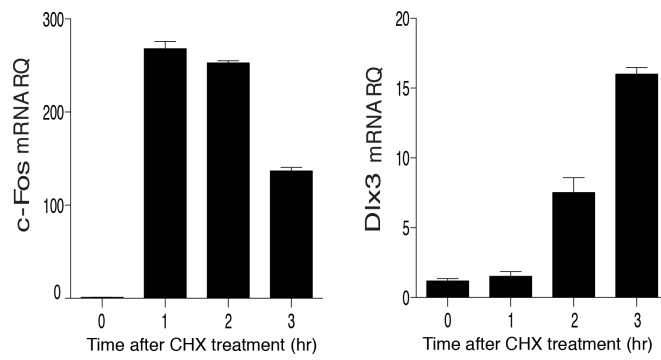

**Supplementary Figure S3.** c-Fos and DLX3 mRNA expression after cycloheximide treatment. Bar graph showing relative expression level of cFos and DLX3 in cultured keratinocyte at 0, 1, 2 and 3 hours post cycloheximide (CHX) treatment.

## Figure S3
