# Supplementary material for: A novel DLX3–PKC integrated signaling network drives keratinocyte differentiation
Source: PubMed Central journal article supplement — Cell Death Differ. 2017 Feb 10;24(4):717–30. doi: 10.1038/cdd.2017.5 (PMC5384032; doi:10.1038/cdd.2017.5), 2017-02-10
Supplement: cdd20175x4.pdf [file cdd20175x4.pdf]

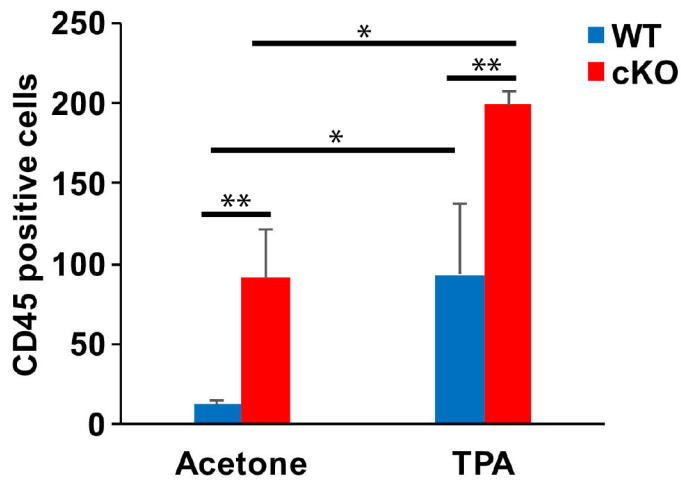

**Supplementary Figure S4.** Increased detection of CD45 expressing cells after TPA topical treatment. CD45 positive cell count in WT and DLX3cKO epidermis +/- TPA were determined by ImageJ analysis of the total labeled particles. Data are presented as mean  $\pm$  SD of three different areas from three different mice for each condition. \*P<0.05; \*\* P<0.01

## Figure S4
