# Supplementary material for: A novel DLX3–PKC integrated signaling network drives keratinocyte differentiation
Source: PubMed Central journal article supplement — Cell Death Differ. 2017 Feb 10;24(4):717–30. doi: 10.1038/cdd.2017.5 (PMC5384032; doi:10.1038/cdd.2017.5), 2017-02-10
Supplement: cdd20175x5.pdf [file cdd20175x5.pdf]

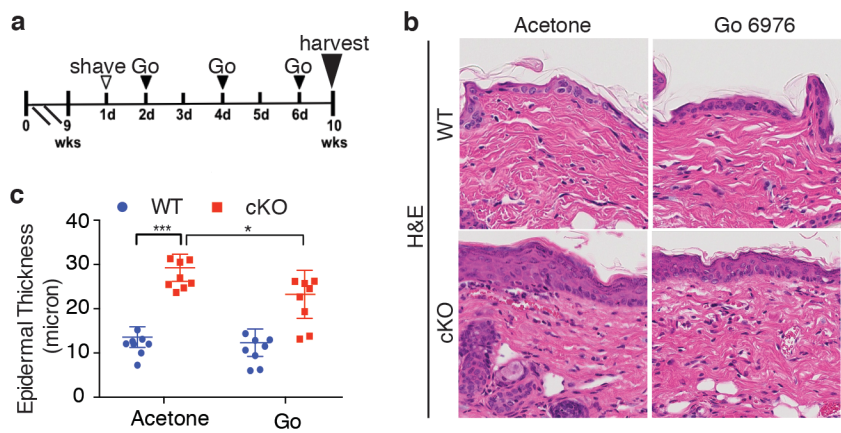

**Supplementary Figure S5.** PKC $\alpha$  inhibition by Gö6976 restores epidermal thickness in DLX3cKO skin. (a) Schematic representation of Gö6976 treatment of WT or DLX3cKO mice. (b) H&E staining of Gö6976 treated WT and DLX3cKO skin. Epidermal thickness was measured and data are presented as mean  $\pm$  SD of three different areas from three mice per condition.

## Figure S5
