# Supplementary material for: A novel DLX3–PKC integrated signaling network drives keratinocyte differentiation
Source: PubMed Central journal article supplement — Cell Death Differ. 2017 Feb 10;24(4):717–30. doi: 10.1038/cdd.2017.5 (PMC5384032; doi:10.1038/cdd.2017.5), 2017-02-10
Supplement: cdd20175x6.pdf [file cdd20175x6.pdf]

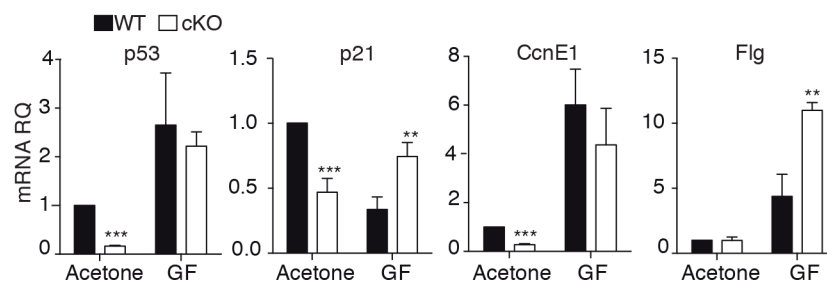

**Supplementary Figure S6.** PKC inhibition affects p53, p21, CcnE1 and filaggrin expression in DLX3cKO skin. Bar graphs showing the expression level of p53, p21, CcnE1 and filaggrin in WT or DLX3cKO keratinocytes treated with GF or Acetone (control vehicle). The results are shown as mean  $\pm$  SD of three independent experiments. \*\*P<0.01, \*\*\*P<0.001

## Figure S6
