# Supplementary material for: A novel DLX3–PKC integrated signaling network drives keratinocyte differentiation
Source: PubMed Central journal article supplement — Cell Death Differ. 2017 Feb 10;24(4):717–30. doi: 10.1038/cdd.2017.5 (PMC5384032; doi:10.1038/cdd.2017.5), 2017-02-10
Supplement: cdd20175x8.pdf [file cdd20175x8.pdf]

| Gene Symbol  | Entrez Gene Name               | Transcript       | Fold-Change (KO ACET vs. WT ACET) | p-value       | q-value       |
|--------------|--------------------------------|------------------|-----------------------------------|---------------|---------------|
| Prkci        | protein kinase C, iota         | NM_008857        | -1,566                            | 0,0024        | 0,0136        |
| Prkcd        | protein kinase C, delta        | NM_011103        | -1,000                            | 0,9965        | 0,6433        |
| Prkcz        | protein kinase C, zeta         | NM_008860        | -1,185                            | 0,1187        | 0,1932        |
| Prkcq        | protein kinase C, theta        | NM_008859        | -2,770                            | 0,0007        | 0,0057        |
| <b>Prkca</b> | <b>protein kinase C, alpha</b> | <b>NM_011101</b> | <b>-2,134</b>                     | <b>0,0019</b> | <b>0,0118</b> |
| Prkcz        | protein kinase C, zeta         | NM_001039079     | 1,078                             | 0,9634        | 0,6433        |

| Gene Symbol  | Entrez Gene Name               | Transcript       | Fold-Change (KO_GF vs. WT ACET) | p-value       | q-value       |
|--------------|--------------------------------|------------------|---------------------------------|---------------|---------------|
| Prkci        | protein kinase C, iota         | NM_008857        | 1,967                           | 0,0001        | 0,0010        |
| Prkcd        | protein kinase C, delta        | NM_011103        | -1,364                          | 0,0027        | 0,0141        |
| Prkcz        | protein kinase C, zeta         | NM_008860        | -1,494                          | 0,0015        | 0,0093        |
| Prkcq        | protein kinase C, theta        | NM_008859        | -2,294                          | 0,0034        | 0,0168        |
| <b>Prkca</b> | <b>protein kinase C, alpha</b> | <b>NM_011101</b> | <b>-1,147</b>                   | <b>0,5004</b> | <b>0,4713</b> |
| Prkcz        | protein kinase C, zeta         | NM_001039079     | 5,299                           | 0,3159        | 0,3588        |

| Gene Symbol  | Entrez Gene Name               | Transcript       | Fold-Change (WT_GF vs. WT ACET) | p-value       | q-value       |
|--------------|--------------------------------|------------------|---------------------------------|---------------|---------------|
| Prkci        | protein kinase C, iota         | NM_008857        | 1,492                           | 0,0024        | 0,0121        |
| Prkcd        | protein kinase C, delta        | NM_011103        | -1,334                          | 0,0021        | 0,0110        |
| Prkcz        | protein kinase C, zeta         | NM_008860        | -1,392                          | 0,0028        | 0,0135        |
| Prkcq        | protein kinase C, theta        | NM_008859        | -1,364                          | 0,1641        | 0,2183        |
| <b>Prkca</b> | <b>protein kinase C, alpha</b> | <b>NM_011101</b> | <b>-1,171</b>                   | <b>0,3907</b> | <b>0,3761</b> |
| Prkcz        | protein kinase C, zeta         | NM_001039079     | 1,783                           | 0,6927        | 0,5354        |

**Supplementary Table 1. PKC isoform Fold-Change in DLX3cKO vs. WT datasets.** Tables showing the Fold-Change values for PKC isoforms detected in DLX3cKO (KO) versus WT or WT skin in presence or absence of GF treatment. p-value and q-value are indicated for each transcript.
