# Supplementary material for: A novel DLX3–PKC integrated signaling network drives keratinocyte differentiation
Source: PubMed Central journal article supplement — Cell Death Differ. 2017 Feb 10;24(4):717–30. doi: 10.1038/cdd.2017.5 (PMC5384032; doi:10.1038/cdd.2017.5), 2017-02-10
Supplement: cdd20175x9.pdf [file cdd20175x9.pdf]

**Supplementary Table 2. Primer list****For human (5'- 3'):**

| Primer Name | Primer Sequence          |
|-------------|--------------------------|
| DLX3-F      | CCCCTCGGCCAATAAGACAG     |
| DLX3-R      | GTTTGGCACCAAAACTGCCA     |
| p21-F       | ATGAAATTCACCCCCTTTCC     |
| p21-R       | CCCTAGGCTGTGCTCACTTC     |
| b-ACTIN-F   | TGGATGATGATATCGCCGCGCTCG |
| b-ACTIN-R   | CACATAGGAATCCTTCTGACCCA  |

**For mouse (5'- 3'):**

| Primer Name | Primer Sequence                   |
|-------------|-----------------------------------|
| Dlx3 F      | ATTACAGCGCTCCTCAGCAT              |
| Dlx3 R      | CTTCCGGCTCCTCTTTCAC               |
| c-Fos F     | CGGGTTTCAACGCCGACTA               |
| c-Fos R     | TTGGCACTAGAGACGGACAGA             |
| Trp53 F     | GTTCAAGGTCATCCTTCCCTG             |
| Trp53 R     | ACCATCGCTTTCGCACCT                |
| p21 F       | GTGGCCTTGTCGCTGTCTT               |
| p21 R       | GCGCTTGGAGTGATAGAAATCTG           |
| Ccne1 F     | GCTTCGGGTCTGAGTTCCAA              |
| Ccne1 R     | GCTGACTGCTATCCTCGCTT              |
| Flg F       | GAAACAGAAGACCCAGAGCAGACTCCCAGAAGG |
| Flg R       | GACTGTCCTCTTCTCCTGATCCCGATCTTGC   |
| Lor F       | GTTGCAACGGAGACAACAGAGCTGGAAGAGTT  |
| Lor R       | TGACTGAGGAGACACTAGAATTGGGAGGTAGTC |
